# Supplementary material for: Collaborative development of predictive toxicology applications
Source: Springer Nature journal article supplement (doi:10.1186/1758-2946-2-7), 2010-08-31
Supplement: Additional file 14 [file 1758-2946-2-7-s14.doc]

**5.14 Additional File 14: Graphical Interface Description of ToxCreate Application Steps**

*ToxCreate Step 1 – Upload Data Set*


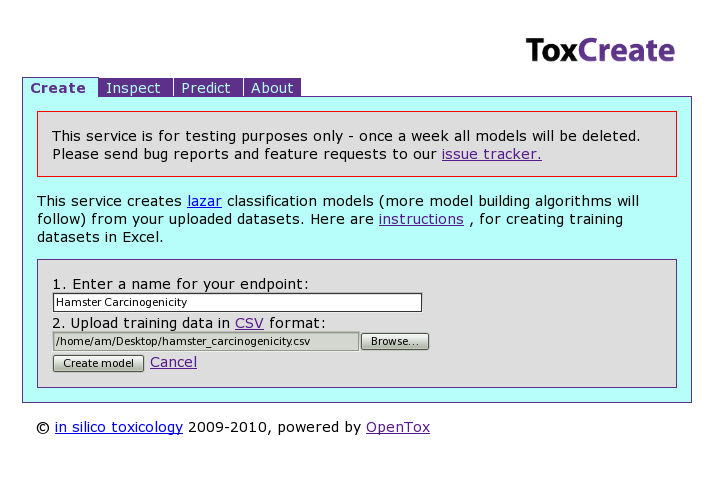


*ToxCreate Step 2 – Create and Display Model*


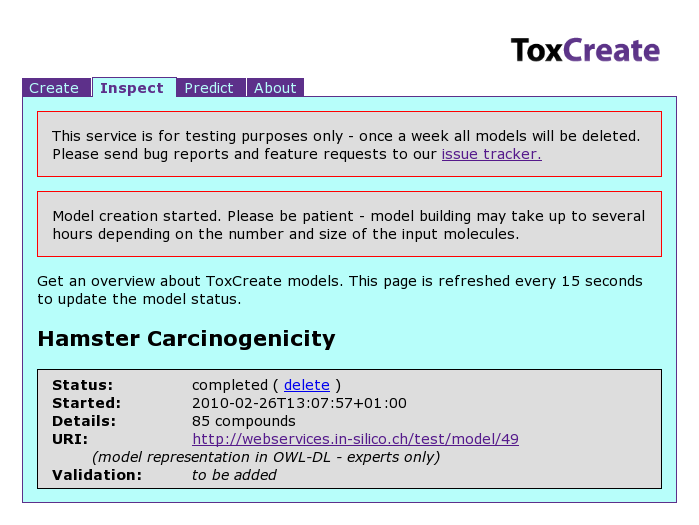


*ToxCreate Step 3 – Select and Use Model(s) for Prediction*


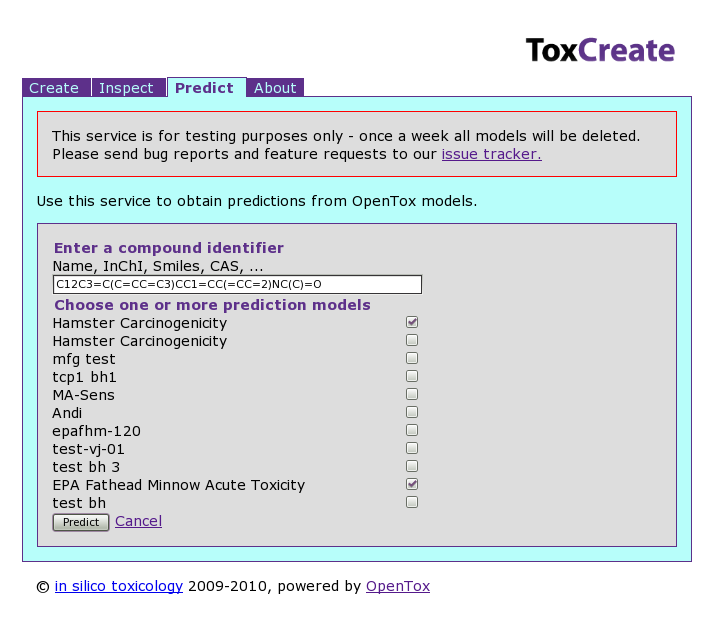


*ToxCreate Step 4 – Display Prediction* *Results*

**
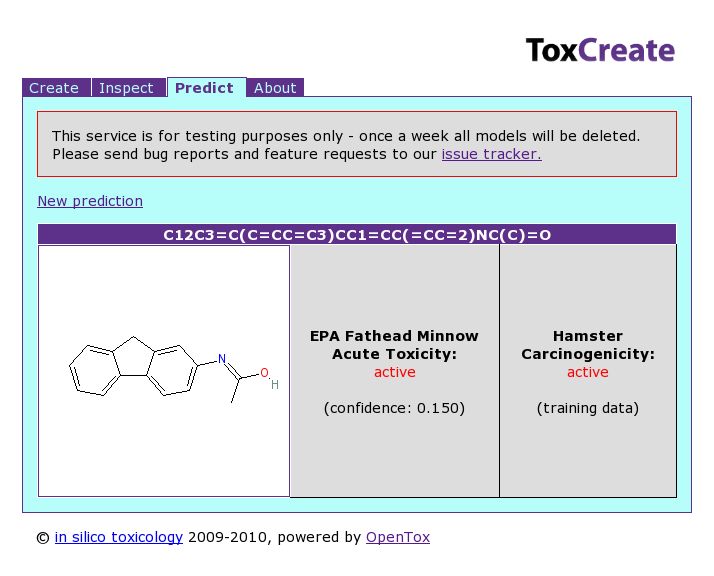
**
